# Supplementary material
Source: publisher figshare collection journal article supplement (https://geolsoc.figshare.com/ndownloader/files/25671932)
Supplement: Supplementary file 1 [file 25671932]

## Sheet: Sheet1
Age (Ma)	Dating method	Data source	Location
1.65	K-Ar	Zhu and Wang, 1989	Hainan
1.64	K-Ar	Zhu and Wang, 1989	Hainan
1.93	K-Ar	Zhu and Wang, 1989	Hainan
1.45	K-Ar	Zhu and Wang, 1989	Hainan
4.05	K-Ar	Zhu and Wang, 1989	Hainan
4.11	K-Ar	Zhu and Wang, 1989	Hainan
5.08	K-Ar	Zhu and Wang, 1989	Hainan
5.34	K-Ar	Zhu and Wang, 1989	Hainan
6.62	K-Ar	Zhu and Wang, 1989	Hainan
16.04	K-Ar	Zhu and Wang, 1989	Hainan
11.68	K-Ar	Zhu and Wang, 1989	Hainan
16.77	K-Ar	Zhu and Wang, 1989	Hainan
1.05	K-Ar	Zhu and Wang, 1989	Hainan
0.45	Ar-Ar	Ho et al., 2000	Hainan
4.13	Ar-Ar	Ho et al., 2000	Hainan
1.12	Ar-Ar	Ho et al., 2000	Hainan
3.57	K-Ar	Ho et al., 2000	Hainan
0.08	K-Ar	Ho et al., 2000	Hainan
0.11	K-Ar	Ho et al., 2000	Hainan
0.43	K-Ar	Ho et al., 2000	Hainan
0.1	K-Ar	Juang and Ho, 1996	Hainan
1.2	K-Ar	Juang and Ho, 1996	Hainan
0.27	K-Ar	Juang and Ho, 1996	Hainan
34.78	K-Ar	Feng, 1992	Hainan
8.97	K-Ar	Feng, 1992	Hainan
6.25	K-Ar	Feng, 1992	Hainan
5.19	K-Ar	Feng, 1992	Hainan
4.26	K-Ar	Feng, 1992	Hainan
2	K-Ar	Feng, 1992	Hainan
0.99	K-Ar	Feng, 1992	Hainan
0.83	K-Ar	Feng, 1992	Hainan
0.35	K-Ar	Feng, 1992	Hainan
0.21	K-Ar	Feng, 1992	Hainan
0.13	K-Ar	Feng, 1992	Hainan
0.01	K-Ar	Ge et al., 1989	Hainan
0.09	K-Ar	Ge et al., 1989	Hainan
0.1	K-Ar	Ge et al., 1989	Hainan
0.2	K-Ar	Ge et al., 1989	Hainan
0.5	K-Ar	Ge et al., 1989	Hainan
0.59	K-Ar	Ge et al., 1989	Hainan
0.61	K-Ar	Ge et al., 1989	Hainan
0.67	K-Ar	Ge et al., 1989	Hainan
0.73	K-Ar	Ge et al., 1989	Hainan
0.78	K-Ar	Ge et al., 1989	Hainan
0.85	K-Ar	Ge et al., 1989	Hainan
0.89	K-Ar	Ge et al., 1989	Hainan
0.9	K-Ar	Ge et al., 1989	Hainan
1.15	K-Ar	Ge et al., 1989	Hainan
1.33	K-Ar	Ge et al., 1989	Hainan
1.48	K-Ar	Ge et al., 1989	Hainan
1.81	K-Ar	Ge et al., 1989	Hainan
2.29	K-Ar	Ge et al., 1989	Hainan
3.76	K-Ar	Ge et al., 1989	Hainan
3.82	K-Ar	Ge et al., 1989	Hainan
4.36	K-Ar	Ge et al., 1989	Hainan
5.86	K-Ar	Ge et al., 1989	Hainan
7.53	K-Ar	Ge et al., 1989	Hainan
0.06	K-Ar	Fan et al., 2004	Hainan
0.11	K-Ar	Fan et al., 2004	Hainan
0.21	K-Ar	Fan et al., 2004	Hainan
0.61	K-Ar	Fan et al., 2004	Hainan
0.67	K-Ar	Fan et al., 2004	Hainan
0.94	K-Ar	Fan et al., 2004	Hainan
1.3	laser Ar-Ar	Sa et al., 2013	Hainan
0.61	laser Ar-Ar	Sa et al., 2013	Hainan
0.54	laser Ar-Ar	Sa et al., 2013	Hainan
0.052	laser Ar-Ar	Sa et al., 2013	Hainan
1	laser Ar-Ar	Sa et al., 2013	Hainan
0.2	laser Ar-Ar	Sa et al., 2013	Hainan
28.43	K-Ar	Sun, 1991	Hainan
11.83	K-Ar	Sun, 1991	Hainan
27.48	K-Ar	Sun, 1991	Hainan
6.92	K-Ar	Sun, 1991	Hainan
1.32	K-Ar	Sun, 1991	Hainan
3.82	K-Ar	Huang et al., 1993	Hainan
0.73	K-Ar	Huang et al., 1993	Hainan
0.63	K-Ar	Huang et al., 1993	Hainan
0.56	TL	Huang et al., 1993	Hainan
0.32	TL	Huang et al., 1993	Hainan
0.31	TL	Huang et al., 1993	Hainan
0.28	TL	Huang et al., 1993	Hainan
0.21	K-Ar	Huang et al., 1993	Hainan
0.15	TL	Huang et al., 1993	Hainan
0.1	K-Ar	Huang et al., 1993	Hainan
1.05	K-Ar	Zhu and Wang, 1989	Leizhou
2.28	K-Ar	Zhu and Wang, 1989	Leizhou
2.96	K-Ar	Zhu and Wang, 1989	Leizhou
3.09	K-Ar	Zhu and Wang, 1989	Leizhou
3.04	K-Ar	Zhu and Wang, 1989	Leizhou
3.61	K-Ar	Zhu and Wang, 1989	Leizhou
6.12	K-Ar	Zhu and Wang, 1989	Leizhou
5.62	K-Ar	Zhu and Wang, 1989	Leizhou
12.46	K-Ar	Zhu and Wang, 1989	Leizhou
0.78	Ar-Ar	Ho et al., 2000	Leizhou
0.18	Ar-Ar	Ho et al., 2000	Leizhou
0.51	Ar-Ar	Ho et al., 2000	Leizhou
0.74	K-Ar	Juang and Ho, 1996	Leizhou
0.74	K-Ar	Juang and Ho, 1996	Leizhou
1.94	K-Ar	Juang and Ho, 1996	Leizhou
0.17	K-Ar	Juang and Ho, 1996	Leizhou
6.31	K-Ar	Feng, 1992	Leizhou
2.9	K-Ar	Feng, 1992	Leizhou
17	K-Ar	Feng, 1992	Leizhou
1.2	K-Ar	Feng, 1992	Leizhou
0.85	K-Ar	Feng, 1992	Leizhou
0.76	K-Ar	Feng, 1992	Leizhou
2.8	K-Ar	Feng, 1992	Leizhou
2.1	K-Ar	Feng, 1992	Leizhou
2.68	K-Ar	Feng, 1992	Leizhou
0.38	K-Ar	Ge et al., 1989	Leizhou
0.58	K-Ar	Ge et al., 1989	Leizhou
0.6	K-Ar	Ge et al., 1989	Leizhou
0.71	K-Ar	Ge et al., 1989	Leizhou
0.92	K-Ar	Ge et al., 1989	Leizhou
1.14	K-Ar	Ge et al., 1989	Leizhou
1.79	K-Ar	Ge et al., 1989	Leizhou
1.9	K-Ar	Ge et al., 1989	Leizhou
2.04	K-Ar	Ge et al., 1989	Leizhou
2.28	K-Ar	Ge et al., 1989	Leizhou
2.85	K-Ar	Ge et al., 1989	Leizhou
2.93	K-Ar	Ge et al., 1989	Leizhou
0.23	laser Ar-Ar	Li et al., 2013	Leizhou
0.2	laser Ar-Ar	Li et al., 2013	Leizhou
0.2	laser Ar-Ar	Li et al., 2013	Leizhou
0.05	laser Ar-Ar	Li et al., 2013	Leizhou
0.13	laser Ar-Ar	Li et al., 2013	Leizhou
0.35	laser Ar-Ar	Li et al., 2013	Leizhou
0.9	K-Ar	Sun, 1991	Leizhou
11.51	K-Ar	Sun, 1991	Leizhou
2.3	K-Ar	Sun, 1991	Leizhou
1.88	K-Ar	Sun, 1991	Leizhou
3.81	K-Ar	Sun, 1991	Leizhou
5.55	K-Ar	Sun, 1991	Leizhou
0.48	K-Ar	Sun, 1991	Leizhou
6.13	TL	Huang et al., 1993	Leizhou
2.5	TL	Huang et al., 1993	Leizhou
2.05	K-Ar	Huang et al., 1993	Leizhou
1.58	K-Ar	Huang et al., 1993	Leizhou
1.48	TL	Huang et al., 1993	Leizhou
1.12	TL	Huang et al., 1993	Leizhou
1.11	TL	Huang et al., 1993	Leizhou
1.11	K-Ar	Huang et al., 1993	Leizhou
0.84	K-Ar	Huang et al., 1993	Leizhou
0.77	TL	Huang et al., 1993	Leizhou
0.76	TL	Huang et al., 1993	Leizhou
0.54	TL	Huang et al., 1993	Leizhou
0.29	TL	Huang et al., 1993	Leizhou
0.24	TL	Huang et al., 1993	Leizhou
0.24	TL	Huang et al., 1993	Leizhou
0.23	TL	Huang et al., 1993	Leizhou
0.19	TL	Huang et al., 1993	Leizhou
0.18	TL	Huang et al., 1993	Leizhou
0.16	TL	Huang et al., 1993	Leizhou
0.15	TL	Huang et al., 1993	Leizhou
0.13	TL	Huang et al., 1993	Leizhou
0.11	K-Ar	Huang et al., 1993	Leizhou
Reference:
Fan, Q., Sun, Q., Li, N., Sui, J., 2004. Periods of volcanic activity and magma evolution of Holocene in North Hainan Island. Acta Petrologica Sinica, 20(3), 533-544 (in Chinese with English Abstract).
Feng, G., 1992. Basic characteristics and relationship to tectonic envioronment of the late Cenozoic basatls along the coast of South China Sea. Supplement to the Journal of Sunyatsen University, 1, 93-103 (in Chinese with English Abstract).
Ge, T.M., Chen, W.J., Xu, X., Li, D.M., Fan, L.M., Li, Q., Wen, S.Y., Wang, X., 1989. The geomagnetic polarity time scale of Quaternary for LeiChiong Region: The K-Ar dating and palaecomagnetic evidences from igneous rocks. Acta Geophysica Sinica, 32(5), 550-558 (in Chinese with English Abstract).
Ho, K.S., Chen, J.C., Juang, W.S., 2000. Geochronology and geochemistry of late Cenozoic basalts from the Leiqiong area, southern China. Journal of Asian Earth Sciences, 18, 307-324.
Huang, Z., Cai, F., Han, Z., Chen, J., Zong, Y., Lin, X., 1993. Leiqiong Quateranry volcano. Science Press, Beijing (in Chinese).
Juang, W.S., Ho, K.S., 1996. Geochemical study of volcanics from backarc basin and continental rifting environments. Geological Society of China Annual Meeting Abstracts, 113-117 (in Chinese).
Li, W., Ji, J., Sang, H., Zhou, J., Tu, J., Sa, X., Ye, H., 2013. Laser 40Ar/39Ar isochron dating on Leizhou volcanic rocks. Acta Petrologica Sinica, 29(8), 2775-2788 (in Chinese with English Abstract).
Sa, X., Ji, J., Zhou, J., 2013. High-precision Laser 40Ar/39Ar dating of Qiongbei volcanic rocks. Acta Petrologica Sinica, 29(8), 2789-2795 (in Chinese with English Abstract).
Sun, J., 1991. Cenozoic volcanic activity in the northern South China Sea and Guangdong coastal area. Marine Geology and Quaternary Geology, 11(3), 45-66 (in Chinese with English Abstract).
Zhu, B., Wang, H., 1989. Nd-Sr-Pb isotopic and chemical evidence for the volcanism with MORB-OIB source characteristics in the Leiqiong area, China. Geochimica, 3, 193-201 (in Chinese with English Abstract).
